# Supplementary material
Source: PubMed Central journal article supplement (PMC11346120)

633

634 **Figure S1. Related to Figure 1**

635 (A) Confocal images of hPSC-amnion stained with indicated markers, outlining nuclear  
636 aspect ratio quantitation.

637 (B) Expression of pluripotency markers, SOX2, NANOG and POU5F1, superimposed  
638 onto the Gel-3D UMAP plot.

639 (C) A UMAP plot displaying the original single cell transcriptome coordinates of the CS7  
640 human embryo described in Tyser *et al.*, shown with the original annotations.

641 (D,E) Expression of indicated broad (D) and late (E) amnion markers superimposed  
642 onto the Tyser UMAP plot.

643 (F) UMAP plots showing the integrated single cell transcriptomes of d1-d4 Gel-3D and  
644 Tyser *et al.* CS7 embryo datasets with individual Tyser annotations.

645

646 **Figure S2. Validation of selected specified and maturing markers in a cynomolgus**  
647 **macaque embryo staged between CS12 and CS13**

648 (A,B) CS12/13 cynomolgus macaque embryo sections were stained for indicated  
649 markers (A: *GABRP* – green, *SESN3* – red, *ISL1* – magenta; B: *ADAMTS18* – green,  
650 *SESN3* – red, *ISL1* – magenta) using RNA *in situ* hybridization. (i) – (vii) indicate insets:  
651 individual channels are shown in gray scale to aid visualization (from left to right:  
652 *GABRP*, *SESN3*, *ISL1* and merge in (A), *ADAMTS18*, *SESN3*, *ISL1* in (B)), and dotted  
653 lines indicate a layer of amniotic epithelium and mesenchyme. Most amnion cells are  
654 positive for *GABRP*, *SESN3* and *ISL1*. *ADAMTS18* expression is restricted to a fraction  
655 of cells. In (iv), there are four *ADAMTS18<sup>high</sup>* cells, while *ADAMTS18* is largely  
656 undetected in the amnion in (v). In (vi) and (vii), most cells are *ADAMTS18<sup>high</sup>*.

657 FB; forebrain, HB, hindbrain; FG, foregut; C; cardiac tissue; NT, neural tube; S, somite.

658 \* indicates an *ISL1*<sup>+</sup> tissue that is likely of genital tubercle lineage. Scale bars = 500µm.

659 (C) An overview image of the CS12/13 embryo implantation site shown in (A). Only  
660 nuclear staining is shown in grayscale. Scale bar = 2mm.

661

662 **Figure S3. Additional expression analyses**

663 (A) Expression of *TBXT* and *CLDN10* superimposed onto the uncropped Tyser *et al.*

664 CS7 human embryo UMAP plot.

665 (B) A UMAP plot displaying the GD14 cynomolgus macaque single cell transcriptome

666 with six identified general clusters (epiblast – light blue; transition – purple; amnion –

667 gold; mesoderm – green; endoderm – teal; extraembryonic mesoderm – salmon). Arrow

668 indicates the likely trajectory of amnion differentiation based on the data in Yang *et al.*

669 as well as the expression analysis in (C). Note that, although not identical to the

670 published UMAP plot in Yang *et al.*, general characteristics are well recapitulated.

671 Trophectoderm cells have been omitted as performed in Yang *et al.*.

672 (C) Expression of indicated markers superimposed onto the Yang *et al.* UMAP plot. Late

673 amnion markers (*EPAS1* and *GABRP*) are expressed at the tip of the *TFAP2A* and *ISL1*

674 double-positive amnion cluster. *CLDN10* positive cells show a weak *TBXT* expression

675 level.

676 (D,E) Individual channels of the whole embryo images in **Fig. 3C** and **3D**, respectively.

677 (F) An overview image of the CS10 (**Fig. 3C**) embryo implantation sites (DNA signal

678 shown in gray scale, Scale bar = 2mm).

679

680 **Figure S4. Validation of two distinct *CLDN10*-KO hPSC lines**

681 (A) Sequenced genotyping results of *CLDN10*-KO #1 and #2 lines. KO lines #1 and #2

682 have similar phenotype, both displaying an increased formation of PGC-LC and

683 defective cyst organization. The second coding sequence of *CLDN10* was targeted.

684 (B) Representative sequence traces for each mutations.

685

686 **Table 1. Lists of differentially expressed genes in pluripotency-exiting (1506),**  
687 **early progenitor (692), late progenitor (697), specified (944), maturing (868), PGC-**  
688 **LC (1181) and advM-LC (746) clusters**

689

690 **Table 2. List of antibodies, RNAscope probes, primers and plasmids used in this**  
691 **study**

## Figure S1

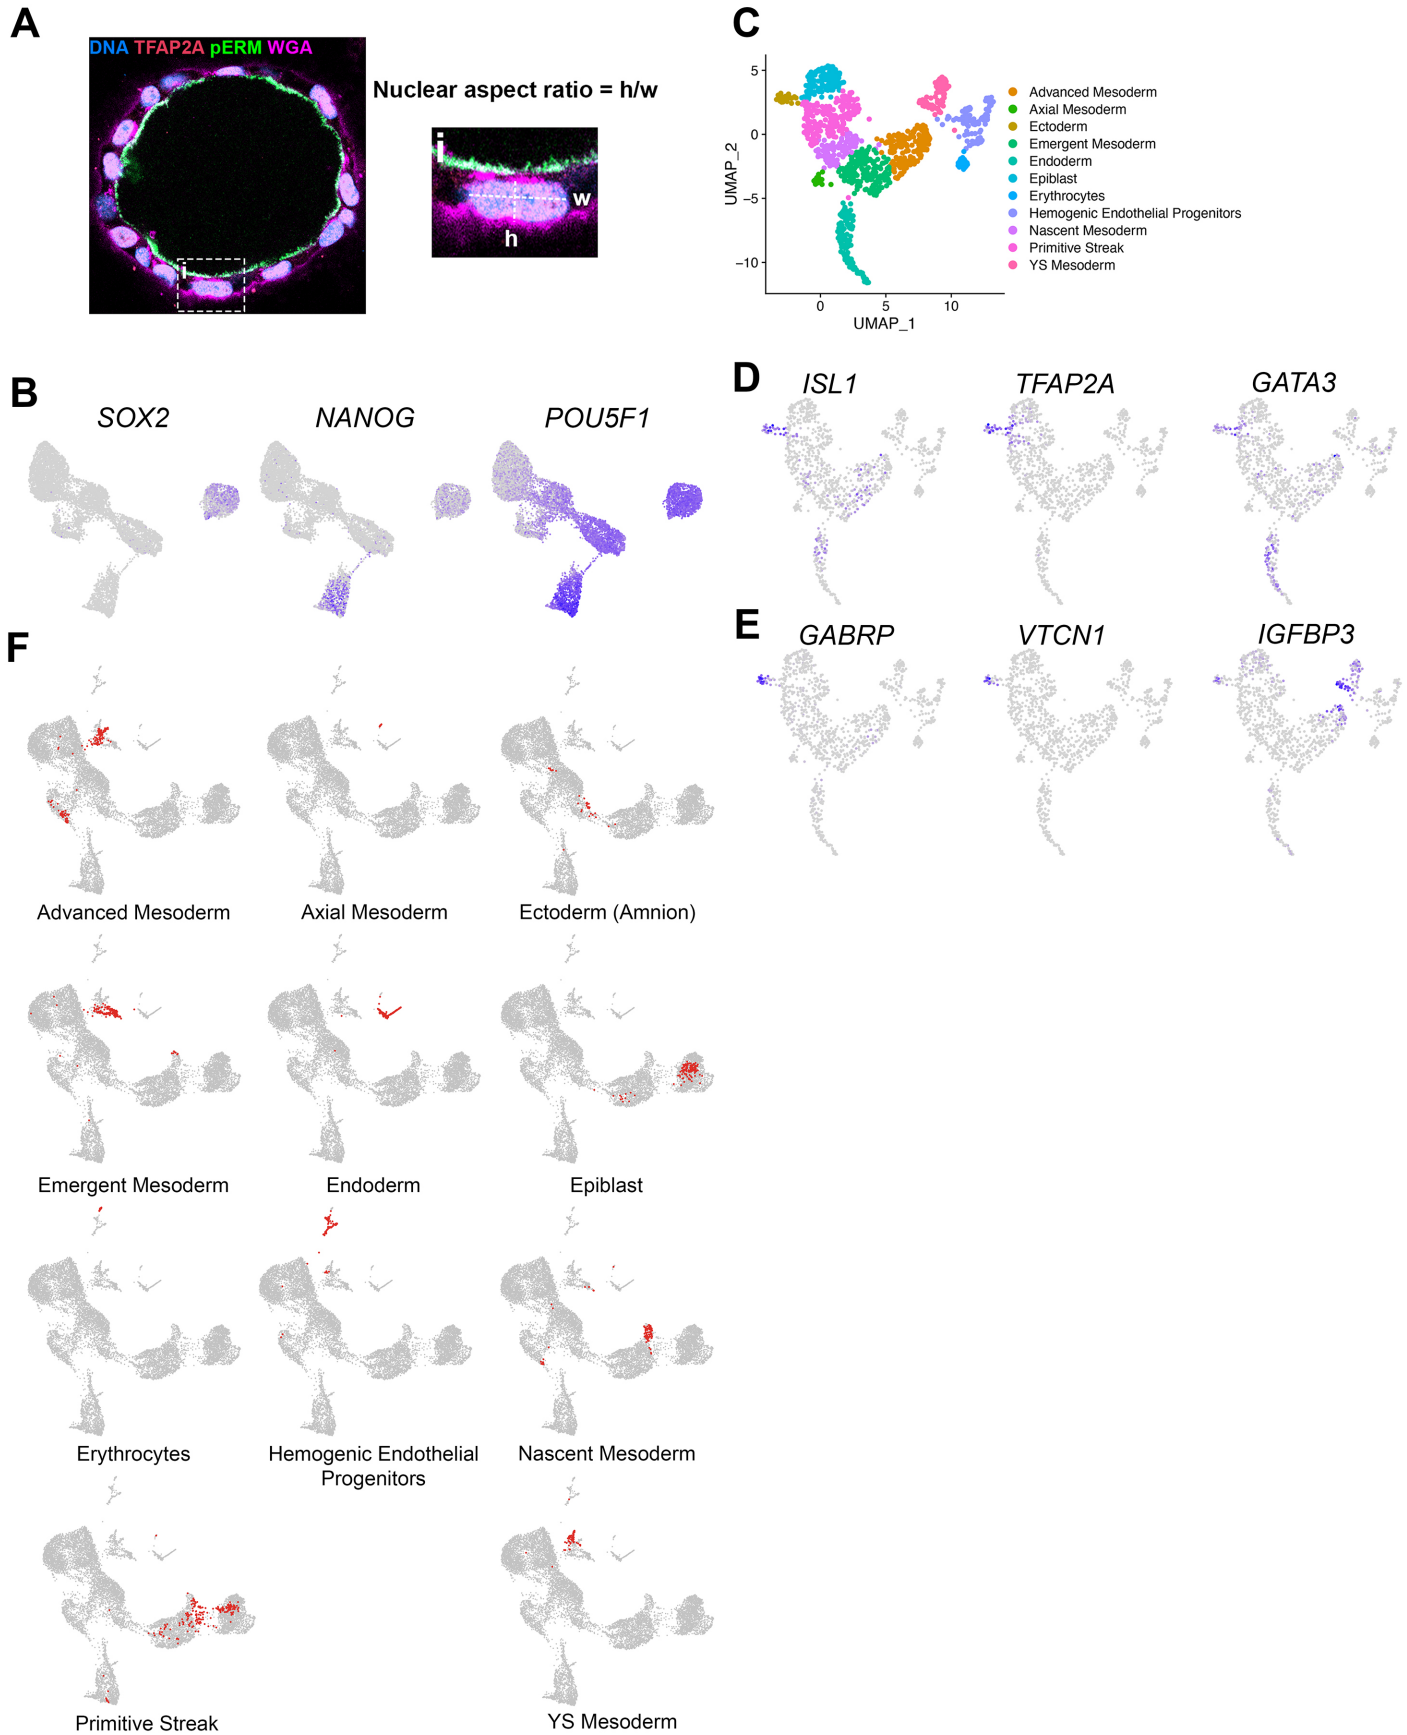

## Figure S2

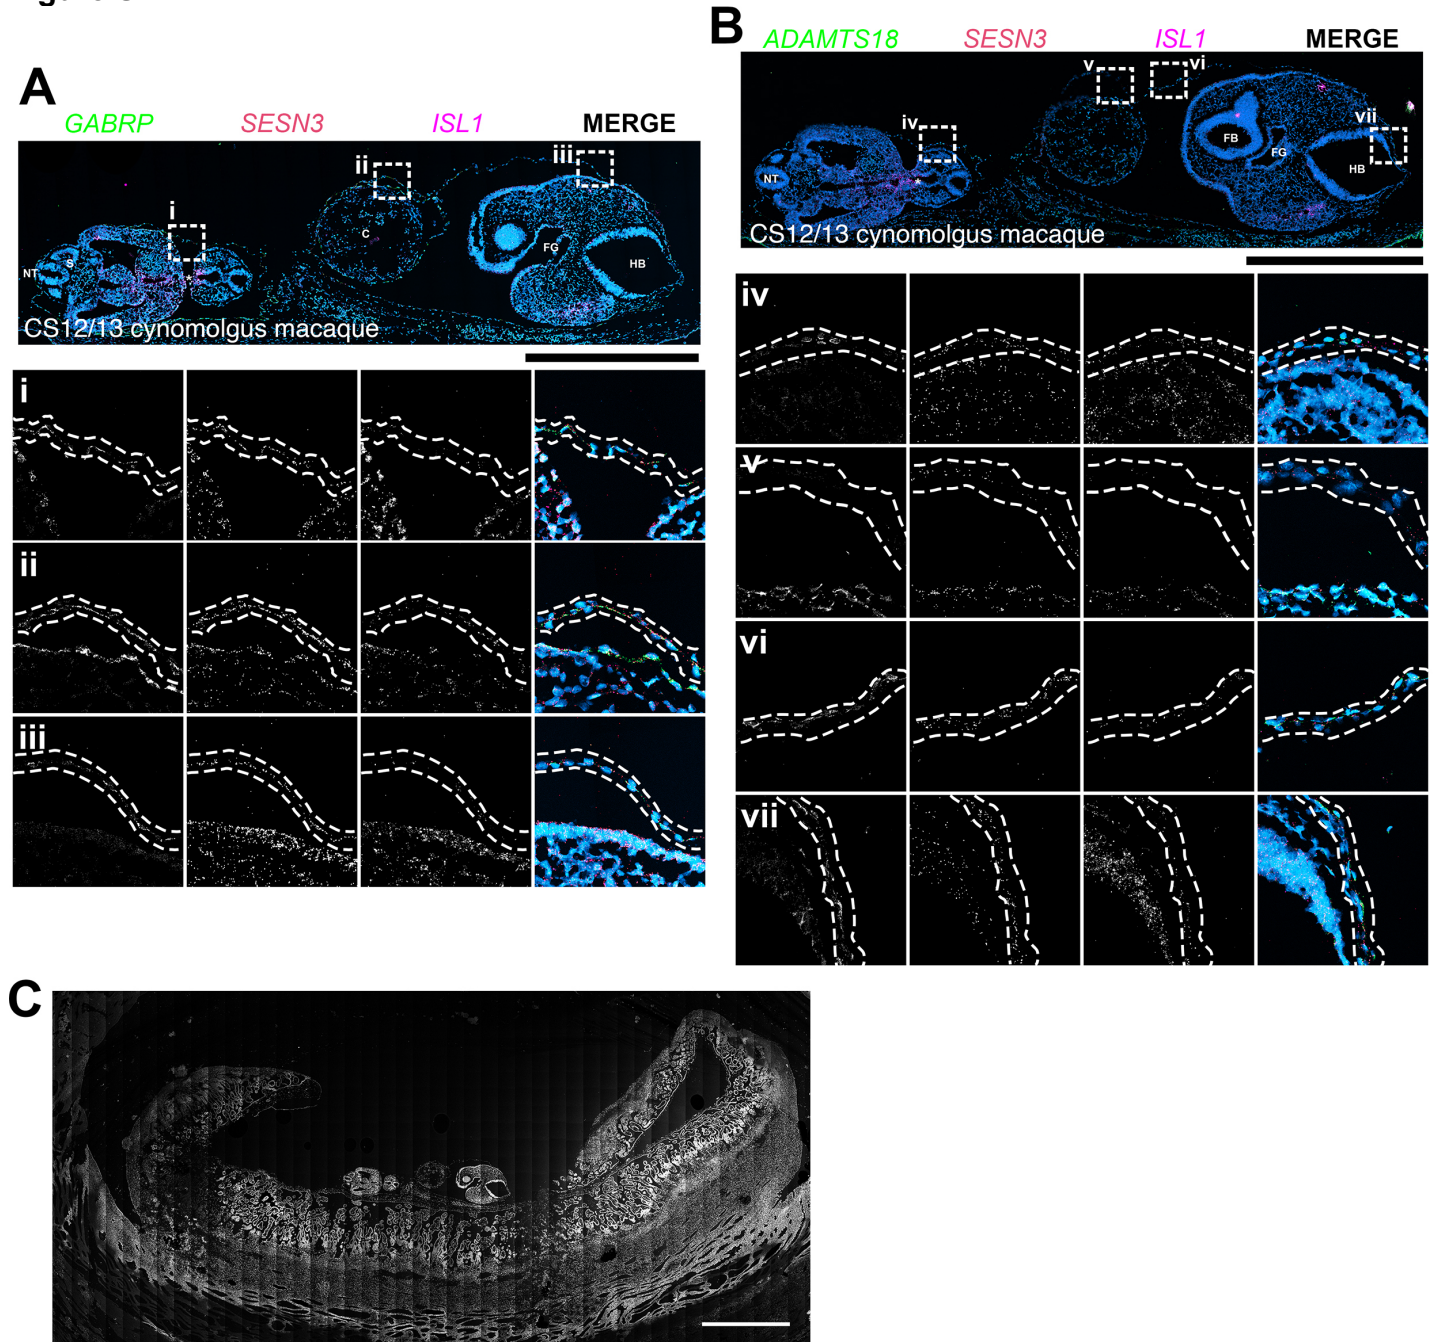

## Figure S3

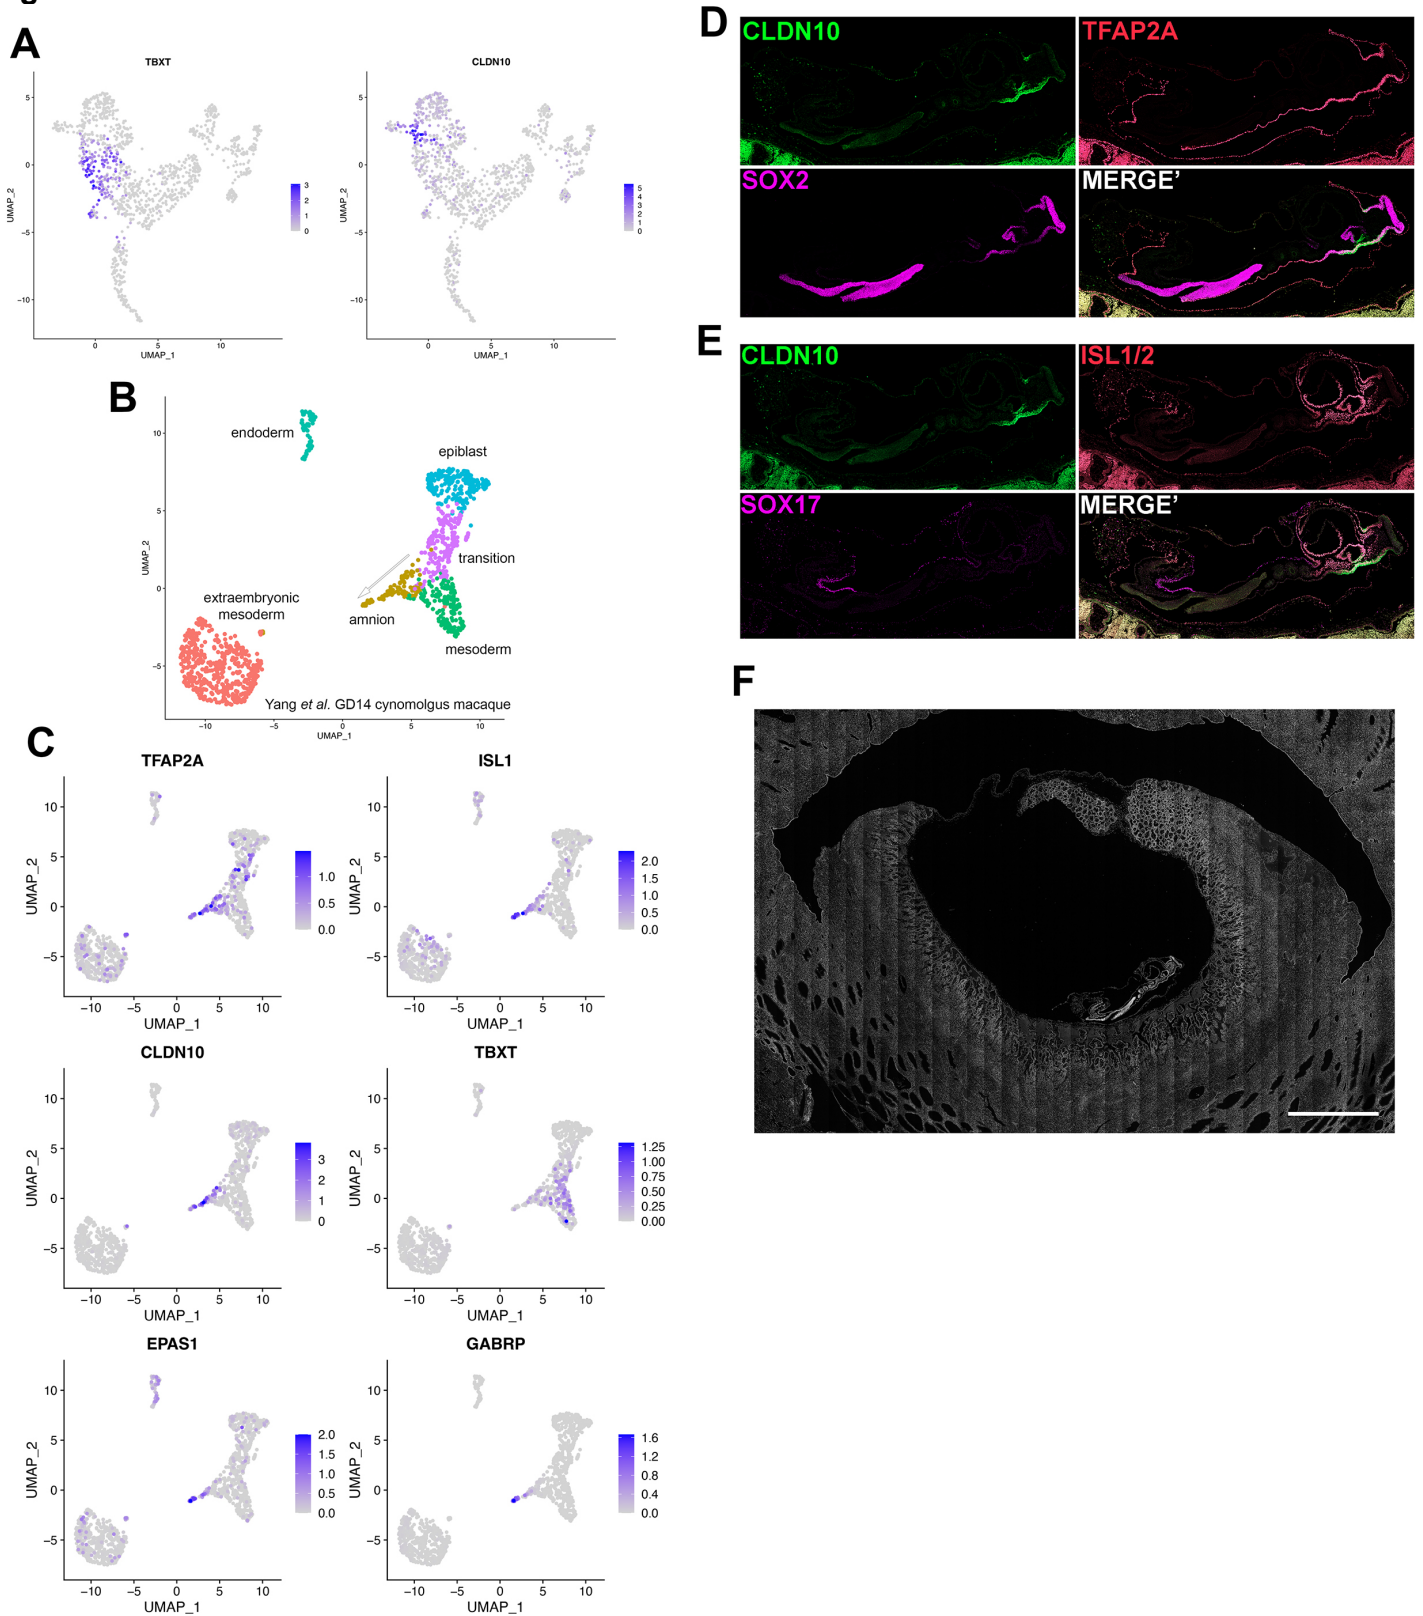

## Figure S4

**A**      **Green: PAM**      **Red: Target sequence**      **---** : Deletion

**CLDN10-WT**  
1. ATGAAGTGTAC**CAAAGTCGGAGGCTCCGATAAA**GCCAAAGCTAAA  
2. ATGAAGTGTAC**CAAAGTCGGAGGCTCCGATAAA**GCCAAAGCTAAA

**CLDN10-KO #1**  
1. ATGAAGTGTAC**-----**TCCGATAAA**GCCAAAGCTAAA** (13bp deletion)  
2. ATGAAGTGTAC**CAA--CGGAGGCTCCGATAAA**GCCAAAGCTAAA (2bp deletion)

**CLDN10-KO #2**  
1. ATGAAGTGTAC**CAA--TCGGAGGCTCCGATAAA**GCCAAAGCTAAA (1bp deletion)  
2. ATGAAGTGTAC**CAA--TCGGAGGCTCCGATAAA**GCCAAAGCTAAA (1bp deletion)

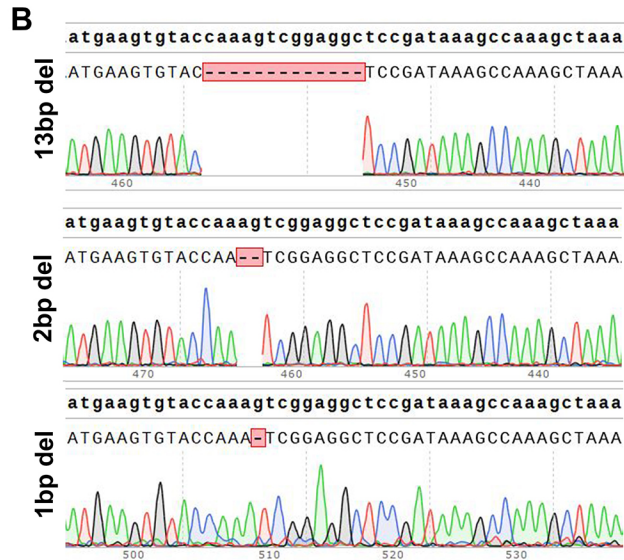

Supplement: NIHPP2023.09.07.556553v3-supplement-3.pdf [file NIHPP2023.09.07.556553v3-supplement-3.pdf]
